# Supplementary material for: Point defect-assisted doping mechanism and related thermoelectric transport properties in Pb-doped BiCuOTe
Source: Royal Society of Chemistry journal article supplement (doi:10.1039/c4ta04057k), 2014-01-01
Supplement: c4ta04057k1.pdf [file c4ta04057k1.pdf]

Supplementary information for:

## **Point defect-assisted doping mechanism and related thermoelectric transport properties in Pb-doped BiCuOTe**

Tae-Ho An,<sup>a,b</sup> Young Soo Lim,<sup>\*a</sup> Hyoung-Seuk Choi,<sup>a</sup> Won-Seon Seo,<sup>a</sup> Cheol-Hee Park,<sup>c</sup> Gwi-Rang Kim,<sup>b</sup> Chan Park,<sup>\*b</sup> Chang Hoon Lee<sup>d</sup> and Ji Hoon Shim<sup>\*d,e</sup>

<sup>a</sup>Energy and Environmental Division, Korea Institute of Ceramic Engineering and Technology, Seoul 153-801, Republic of Korea. <sup>b</sup>Department of Materials Science and Engineering, Seoul National University, Seoul 151-744, Republic of Korea. <sup>c</sup>LG Chem/Research Park, Daejeon 305-380, Republic of Korea <sup>d</sup>Department of Chemistry, Pohang University of Science and Technology, Pohang 790-784, Korea. <sup>e</sup>Divisions of Advanced Nuclear Engineering, Pohang University of Science and Technology, Pohang 790-784, Korea

E-mail: yslim@kicet.re.kr (Y.S. Lim), pchan@snu.ac.kr (C. Park) and jhshim@postech.ac.kr (J.H. Shim)

**Figure S1.** Relative intensities of the main peak for  $\text{Bi}_2\text{O}_3$  (111) to that for  $\text{BiCuOTe}$  (102) in the XRD patterns of Fig. 1(a).

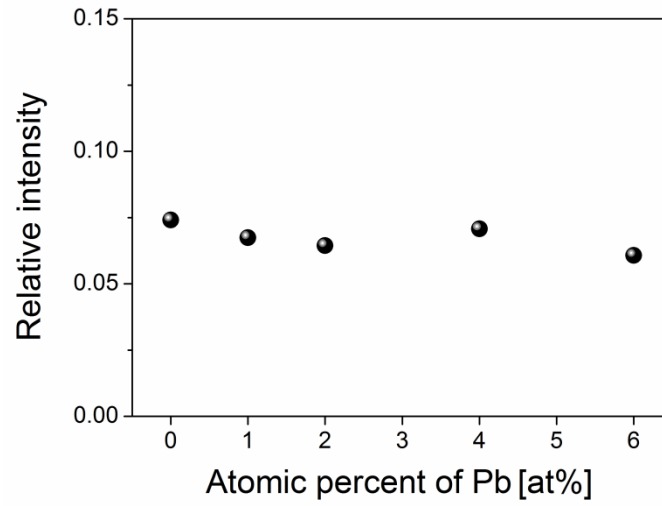

**Table S1.** Lattice parameters of Pb-doped BiCuOTe compounds.

| Pb (at%) | $a$ (nm)                           | $c$ (nm)                           |
|----------|------------------------------------|------------------------------------|
| 0        | $0.4035 \pm 0.8146 \times 10^{-4}$ | $0.9516 \pm 0.2215 \times 10^{-4}$ |
| 1        | $0.4037 \pm 1.3041 \times 10^{-4}$ | $0.9524 \pm 0.6141 \times 10^{-4}$ |
| 2        | $0.4039 \pm 3.7186 \times 10^{-4}$ | $0.9534 \pm 3.2486 \times 10^{-4}$ |
| 4        | $0.4047 \pm 8.6220 \times 10^{-4}$ | $0.9562 \pm 5.5241 \times 10^{-4}$ |
| 6        | $0.4043 \pm 9.9589 \times 10^{-4}$ | $0.9572 \pm 0.9802 \times 10^{-4}$ |
